# Supplementary material for: Evaluation of Four Indigenous Non-Saccharomyces Yeasts Isolated from the Shangri-La Wine Region (China) for Their Fermentation Performances and Aroma Compositions in Synthetic Grape Juice Fermentation
Source: MDPI journal article supplement (doi:10.3390/jof8020146), 2022-01-30
Supplement: s1 [file s1]

## Supplementary data

Table S1 Detailed information of 26S rRNA D1/D2 region and 5.8S rRNA ITS region of four non-*Saccharomyces* yeast isolates.

| Species (Strain)                         | 26S rRNA D1/D2 region |                            | 5.8S rRNA ITS region |                            |
|------------------------------------------|-----------------------|----------------------------|----------------------|----------------------------|
|                                          | Fragment Size (bp)    | Gen Bank accession numbers | Fragment Size (bp)   | Gen Bank accession numbers |
| <i>Meyerozyma guilliermondii</i> (AD-58) | 586                   | MN371925                   | 578                  | MN371912                   |
| <i>Saccharomycopsis vini</i> (BZL-28)    | 580                   | MN371928                   | 575                  | MN371909                   |
| <i>Saturnispora diversa</i> (BZL-11)     | 546                   | MN371926                   | 377                  | MN371911                   |
| <i>Wickerhamomyces anomalus</i> (DR-110) | 577                   | MN371940                   | 591                  | MN371897                   |

Table S2 Identification methods, quantitative standards and calibration curves of volatile aroma compounds

| No.                    | Compound              | CAS      | RI <sup>1</sup> | Identification <sup>2</sup> | Quantitative standards | Calibration curves <sup>3</sup>            | R <sup>2</sup>  |
|------------------------|-----------------------|----------|-----------------|-----------------------------|------------------------|--------------------------------------------|-----------------|
| <b>Higher alcohols</b> |                       |          |                 |                             |                        |                                            |                 |
| 1                      | 1-Propanol            | 71-23-8  | 1036            | A                           | 1-Propanol             | y=78880.76x+283.05<br>*y=101171.67x-291.63 | 0.992<br>*0.999 |
| 2                      | 2-Methyl-1-propanol   | 78-83-1  | 1085            | A                           | 2-Methyl-1-propanol    | y=12472.11x-2026.42<br>*y=27221.21x-44.37  | 0.998<br>*0.992 |
| 3                      | Butanol               | 71-36-3  | 1142            | A                           | Butanol                | y=17005.28x-243.71                         | 0.997           |
| 4                      | 3-Methyl-1-butanol    | 123-51-3 | 1213            | A                           | 3-Methyl-1-butanol     | y=5854.17x-66.48<br>*y=5605.10x-37.07      | 0.995<br>*0.996 |
| 5                      | 3-Methyl-3-buten-1-ol | 763-32-6 | 1254            | A                           | 3-Methyl-3-buten-1-ol  | y=3516.67x+4.70                            | 0.998           |
| 6                      | 3-Methyl-1-pentanol   | 589-35-5 | 1333            | A                           | 3-Methyl-1-pentanol    | y=1184.99x+0.53                            | 0.999           |
| 7                      | 3-Ethoxy-1-propanol   | 111-35-3 | 1386            | A                           | 3-Ethoxy-1-propanol    | y=99612.46x-3156.06                        | 0.996           |
| 8                      | 2-Ethyl-1-hexanol     | 104-76-7 | 1498            | A                           | 2-Ethyl-1-hexanol      | y=74.05x+1.75<br>*y=122.97x-2.14           | 0.999<br>*0.998 |
| 9                      | 2-Nonanol             | 628-99-9 | 1527            | B                           | Nonanol                | y=50.00x+6.81                              | 0.996           |

|                                |                          |            |      |   |                          |                                            |                   |
|--------------------------------|--------------------------|------------|------|---|--------------------------|--------------------------------------------|-------------------|
| 10                             | Octanol                  | 111-87-5   | 1566 | A | Octanol                  | $y=105.15x+5.79$<br>$y=75.52x+4.22$        | $*0.999$<br>0.999 |
| 11                             | Nonanol                  | 143-08-8   | 1669 | A | Nonanol                  | $*y=140.13x+0.81$<br>$y=50.00x+6.81$       | $*0.999$<br>0.996 |
| 12                             | 3-Methylthio-1-propanol  | 505-10-2   | 1730 | A | 3-Methylthio-1-propanol  | $*y=105.15x+5.79$<br>$y=18566.74x+2.51$    | $*0.999$<br>0.998 |
| 13                             | Benzyl alcohol           | 100-51-6   | 1891 | A | Benzyl alcohol           | $y=5299.90x+43.48$<br>$*y=5683.08x+38.55$  | 0.999<br>$*0.999$ |
| 14                             | 2-Phenylethanol          | 60-12-8    | 1928 | A | 2-Phenylethanol          | $y=4344.55x-164.68$<br>$*y=3723.87x+50.50$ | 0.986<br>$*0.999$ |
| <b>Polyols</b>                 |                          |            |      |   |                          |                                            |                   |
| 1                              | 2R,3R-Butanediol         | 24347-58-8 | 1549 | B | 2R,3S-Butanediol         | $y=1172078.80x-90.76$                      | 0.986             |
| 2                              | 2R,3S-Butanediol         | 5341-95-7  | 1585 | A | 2R,3S-Butanediol         | $y=1172078.80x-90.76$                      | 0.986             |
| <b>Acetate esters</b>          |                          |            |      |   |                          |                                            |                   |
| 1                              | Ethyl acetate            | 141-78-6   | 935  | A | Ethyl acetate            | $y=7702.52x-63.10$<br>$*y=9816.85x-48.96$  | 0.997<br>$*0.999$ |
| 2                              | Propyl acetate           | 109-60-4   | 985  | A | Propyl acetate           | $y=1280.09x-35.15$<br>$*y=3577.12x-54.12$  | 0.998<br>$*0.999$ |
| 3                              | 3-Methylbutyl acetate    | 123-92-2   | 1118 | A | 3-Methylbutyl acetate    | $y=172.07x-1.80$<br>$*y=602.56x-8.94$      | 0.999<br>$*0.999$ |
| 4                              | Geranyl acetate          | 105-87-3   | 1764 | A | Geranyl acetate          | $*y=43806.71x+5.01$                        | $*0.998$          |
| 5                              | Phenylethyl acetate      | 103-45-7   | 1829 | A | Phenylethyl acetate      | $y=247.55x+14.40$                          | 0.998             |
| <b>Fatty acid ethyl esters</b> |                          |            |      |   |                          |                                            |                   |
| 1                              | Ethyl propionate         | 105-37-3   | 974  | A | Ethyl propionate         | $y=2402.71x-99.01$<br>$*y=6388.89x-169.66$ | 0.999<br>$*0.998$ |
| 2                              | Ethyl 2-methylpropanoate | 97-62-1    | 979  | A | Ethyl 2-methylpropanoate | $y=400.21x+41.51$                          | 0.995             |

|                     |                                  |            |      |   |                             |                     |        |
|---------------------|----------------------------------|------------|------|---|-----------------------------|---------------------|--------|
| 3                   | Ethyl 2-methylbutyrate           | 7452-79-1  | 1048 | A | Ethyl 2-methylbutyrate      | $y=290.22x-1.25$    | 0.999  |
| 4                   | Ethyl 3-methylbutyrate           | 108-64-5   | 1063 | A | Ethyl 3-methylbutyrate      | $y=256.97x-0.14$    | 0.999  |
| 5                   | Ethyl hexanoate                  | 123-66-0   | 1239 | A | Ethyl hexanoate             | $y=81.85x+7.95$     | 0.999  |
| 6                   | Ethyl octanoate                  | 106-32-1   | 1444 | A | Ethyl octanoate             | $y=80.31x+17.55$    | 0.997  |
| 7                   | Ethyl decanoate                  | 110-38-3   | 1649 | A | Ethyl decanoate             | $y=191.14x+22.39$   | 0.998  |
| 8                   | Ethyl phenylacetate              | 101-97-3   | 1797 | A | Ethyl phenylacetate         | $y=192.17x+16.32$   | 0.998  |
| 9                   | Ethyl dodecanoate                | 106-33-2   | 1854 | A | Ethyl dodecanoate           | $y=171.71x+18.41$   | 0.998  |
| 10                  | Ethyl tetradecanoate             | 124-06-1   | 2053 | B | -                           | $**y=2030x$         |        |
| 11                  | Ethyl hexadecanoate              | 628-97-7   | 2243 | A | Ethyl hexadecanoate         | $y=1294.7x+5.97$    | 0.995  |
| <b>other esters</b> |                                  |            |      |   |                             |                     |        |
| 1                   | 2-Methylpropyl 2-methylbutanoate | 2445-67-2  | 1182 | B | -                           | $**y=2030x$         |        |
| 2                   | 3-Methylbutyl propionate         | 105-68-0   | 1196 | A | 3-Methylbutyl propionate    | $y=104.62x+6.24$    | 0.998  |
| 3                   | 3-Methylbutyl 2-methylpropanoate | 2050-01-3  | 1202 | B | -                           | $**y=2030x$         |        |
| 4                   | 3-Methylbutyl 2-methylbutanoate  | 27625-35-0 | 1285 | B | -                           | $**y=2030x$         |        |
| 5                   | 2-Methylbutyl 2-methylbutanoate  | 2445-78-5  | 1288 | B | -                           | $**y=2030x$         |        |
| <b>Terpenes</b>     |                                  |            |      |   |                             |                     |        |
| 1                   | $\beta$ -Myrcene                 | 123-35-3   | 1163 | A | $\beta$ -Myrcene            | $*y=2090.89x+14.61$ | *0.998 |
| 2                   | D-Limonene                       | 5989-27-5  | 1207 | A | D-Limonene                  | $*y=1884.95x+3.35$  | *0.995 |
| 3                   | (Z)- $\beta$ -Ocimene            | 3338-55-4  | 1238 | A | (Z) & (E)- $\beta$ -Ocimene | $*y=4531.22x+6.63$  | *0.993 |
| 4                   | (E)- $\beta$ -Ocimene            | 3779-61-1  | 1256 | A | (Z) & (E)- $\beta$ -Ocimene | $*y=4531.22x+6.63$  | *0.993 |
| 5                   | Linalool                         | 78-70-6    | 1554 | A | Linalool                    | $*y=161.76x+9.56$   | *0.999 |
| 6                   | $\alpha$ -Terpineol              | 98-55-5    | 1711 | A | $\alpha$ -Terpineol         | $y=259.15x+8.36$    | 0.999  |
|                     |                                  |            |      |   |                             | $*y=194.29x+8.19$   | *0.999 |
| 7                   | Citral                           | 5392-40-5  | 1745 | A | Citral                      | $*y=3273.54x+44.80$ | *0.997 |
| 8                   | Citronellol                      | 106-22-9   | 1774 | A | Citronellol                 | $y=119.45x+8.68$    | 0.998  |
|                     |                                  |            |      |   |                             | $*y=190.91x-4.63$   | *0.998 |

|                           |                            |            |      |   |                         |                                              |                 |
|---------------------------|----------------------------|------------|------|---|-------------------------|----------------------------------------------|-----------------|
| 9                         | Nerol                      | 106-25-2   | 1810 | A | Nerol                   | $y=278.03x+14.72$<br>$*y=444.63x+12.58$      | 0.999<br>*0.999 |
| 10                        | Geraniol                   | 106-24-1   | 1858 | A | Geraniol                | $y=353.36x+17.51$<br>$*y=398.22x+15.43$      | 0.999<br>*0.999 |
| <b>Fatty acids</b>        |                            |            |      |   |                         |                                              |                 |
| 1                         | Isobutyric acid            | 79-31-2    | 1577 | A | Isobutyric acid         | $y=23353.68x+142.05$<br>$*y=18813.94x+40.49$ | 0.993<br>*0.997 |
| 2                         | Butanoic acid              | 107-92-6   | 1638 | A | Butanoic acid           | $y=20068.70x+39.73$                          | 0.998           |
| 3                         | Isovaleric acid            | 503-74-2   | 1682 | A | Isovaleric acid         | $y=6672.94x+4.61$                            | 0.991           |
| 4                         | Octanoic acid              | 124-07-2   | 2071 | A | Octanoic acid           | $y=751.96x+75.23$                            | 0.997           |
| 5                         | Decanoic acid              | 334-48-5   | 2265 | B | -                       | $**y=2030x$                                  |                 |
| <b>Carbonyl compounds</b> |                            |            |      |   |                         |                                              |                 |
| 1                         | 4-Methyl-2-pentanone       | 108-10-1   | 1010 | B | -                       | $**y=2030x$                                  |                 |
| 2                         | 3-Penten-2-one             | 625-33-2   | 1130 | B | -                       | $**y=2030x$                                  |                 |
| 3                         | 5-Methyl-2-hexanone        | 110-12-3   | 1187 | B | -                       | $**y=2030x$                                  |                 |
| 4                         | Acetoin                    | 513-86-0   | 1299 | A | Acetoin                 | $y=127541.70x-203.01$                        | 0.993           |
| 5                         | 6-Methyl-5-hepten-2-one    | 110-93-0   | 1344 | A | 6-Methyl-5-hepten-2-one | $y=126.68x+1.39$                             | 0.999           |
| 7                         | 2-Nonanone                 |            | 1396 | B | -                       | $**y=2030x$                                  |                 |
| 6                         | Nonanal                    | 124-19-6   | 1402 | A | Nonanal                 | $y=66.38x+12.98$<br>$*y=522.66x+14.02$       | 0.998<br>*0.999 |
| 8                         | Benzaldehyde               | 100-52-7   | 1535 | A | Benzaldehyde            | $y=338.47x+10.09$<br>$*y=411.90x+7.36$       | 0.999<br>*0.999 |
| <b>Other compounds</b>    |                            |            |      |   |                         |                                              |                 |
| 1                         | 1-(1-ethoxyethoxy)-pentane | 13442-89-2 | 1101 | B | -                       | $**y=2030x$                                  |                 |
| 2                         | $\gamma$ -Butyrolactone    | 96-48-0    | 1643 | B | -                       | $**y=2030x$                                  |                 |

1. Retention indices (RIs) were calculated on DB-Wax capillary column.

2. Identification of volatile aroma compounds: A, mass spectrum and RI agreed with standards; B, mass spectrum and RI agreed with NIST 14 MS database and literature data.
3. In calibration curves, “y” means the concentration of volatile aroma compound ( $\mu\text{g/L}$ ); “x” means the area ratio of volatile aroma compound to internal standard (4-methyl-2-pentanol). “\*” means the calibration curve of these compounds were plotted in 1.0 % (v/v) model wine solution. “\*\*” means the concentration of these compounds was expressed as relative amount compared to internal standard.

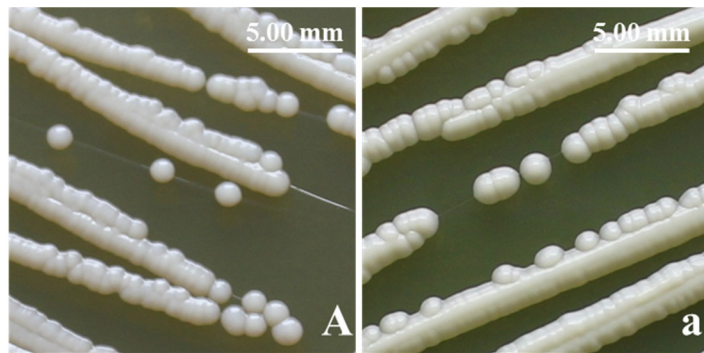

*Meyerozyma guilliermondii* (AD-58)

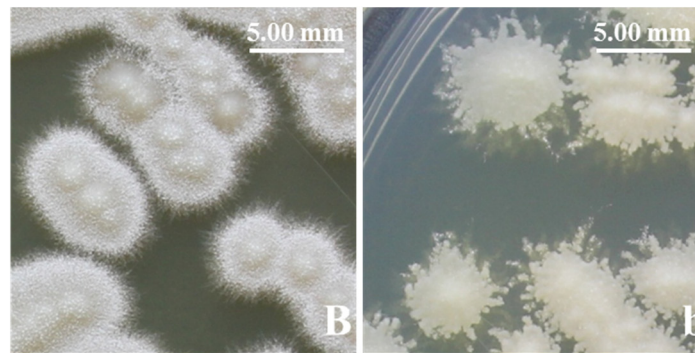

*Saccharomycopsis vini* (BZL-28)

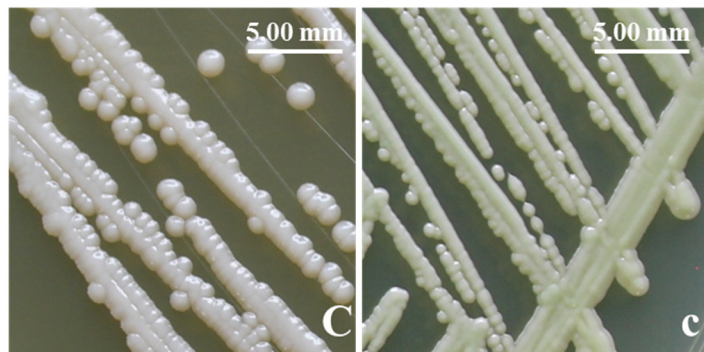

*Saturnispora diversa* (BZL-11)

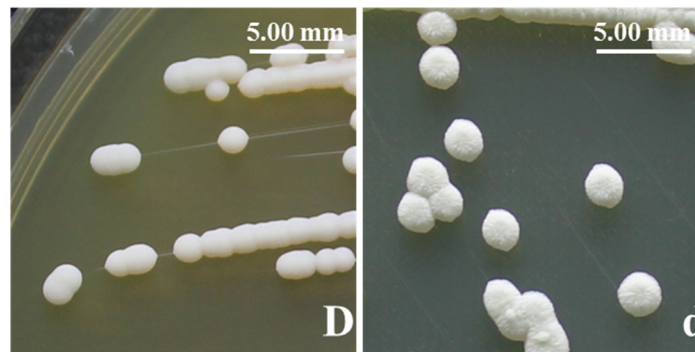

*Wickerhamomyces anomalus* (DR-110)

Figure S1 The colony morphologies of four non-Saccharomyces yeast isolates on YPD (A, B, C, D) and WL (a, b, c, d) agar.

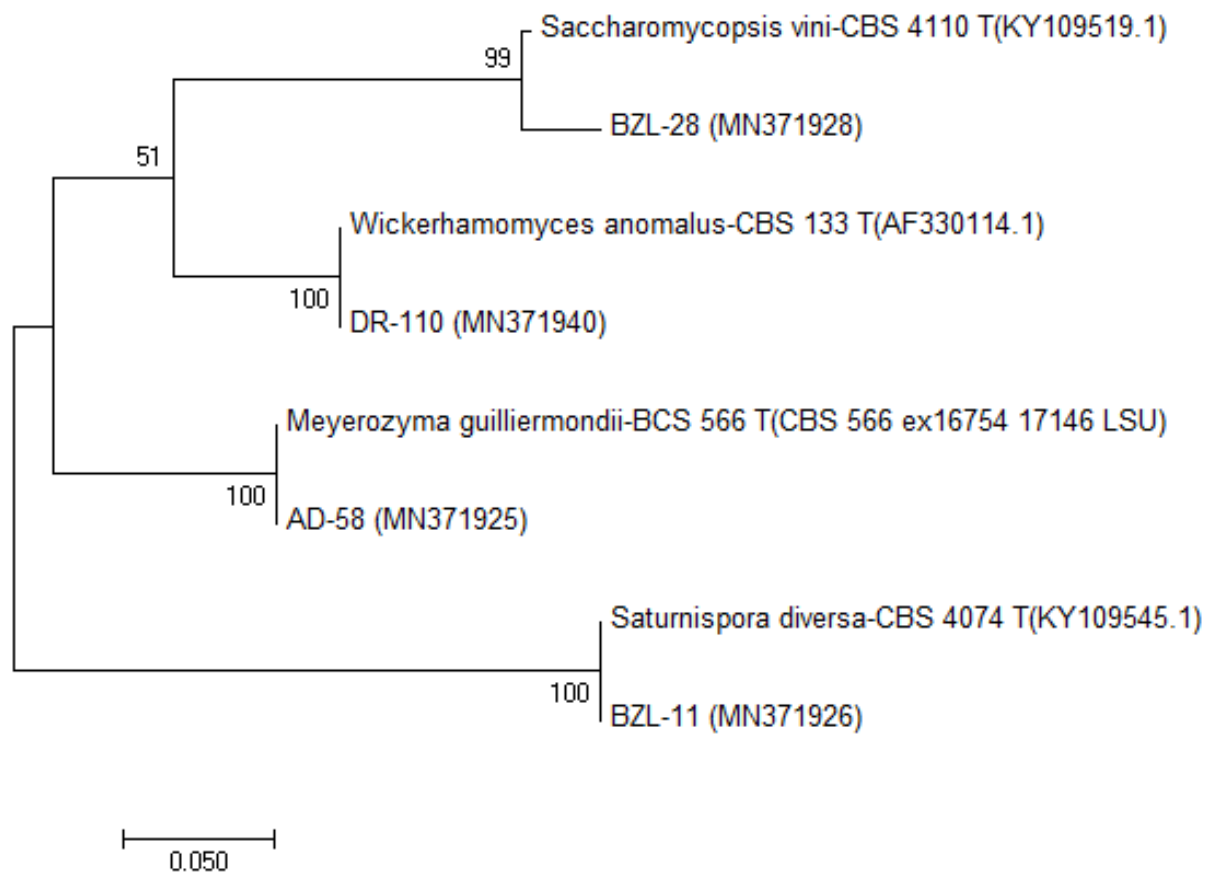

Figure S2 Phylogenetic tree of four non-*Saccharomyces* yeast isolates based on the sequence analysis of the 26S rRNA D1/D2 region using the maximum-likelihood method. The scale bar shows 0.05, Bootstrap support values were estimated based on 1000 replicates.

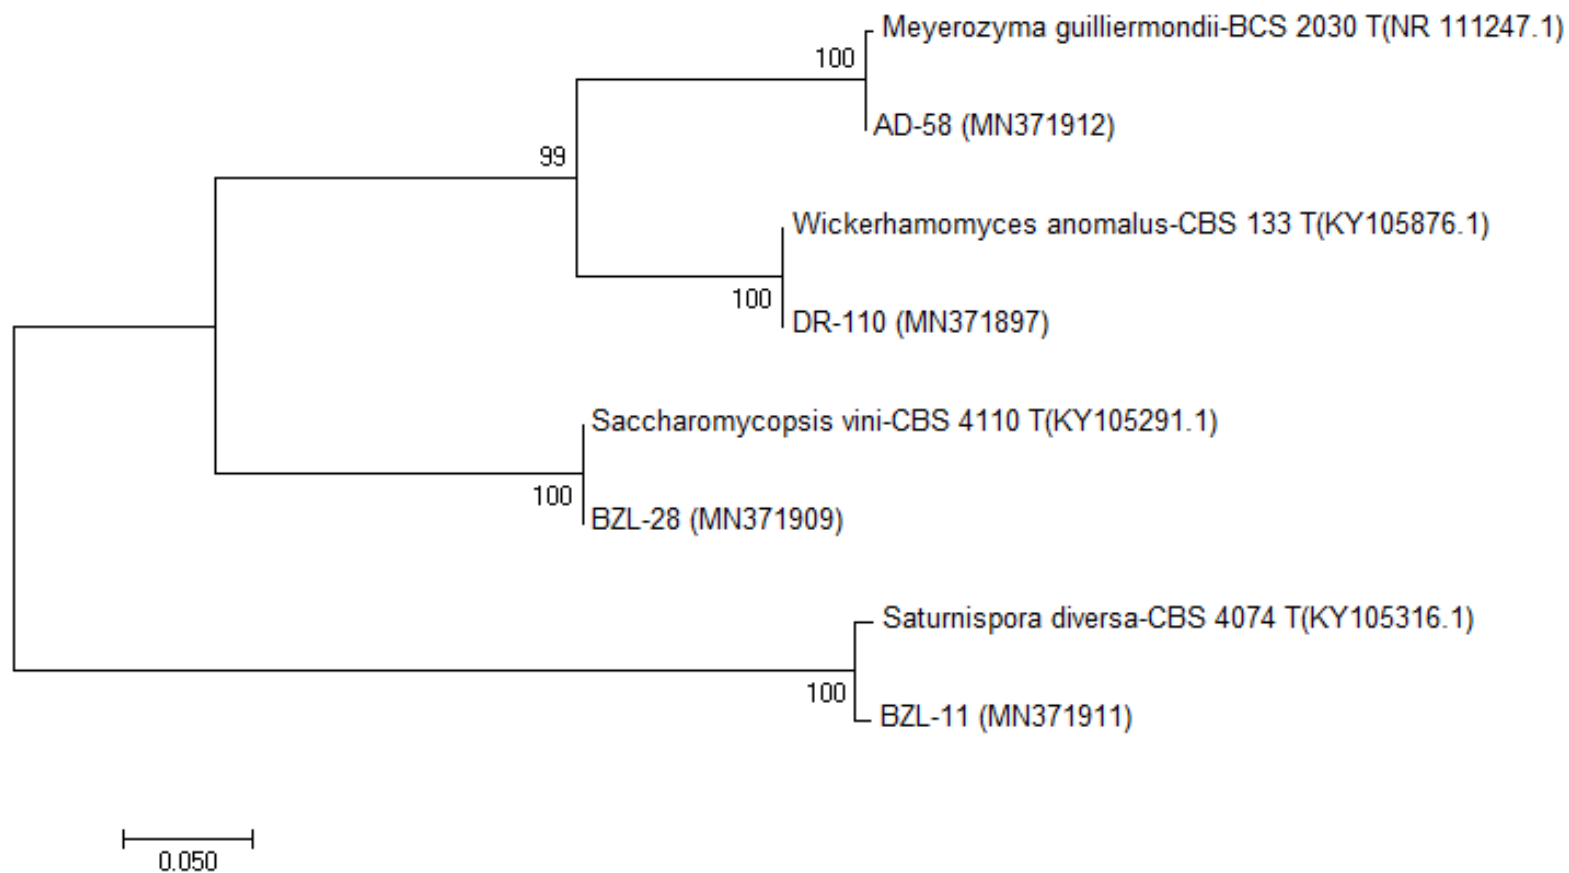

Figure S3 Phylogenetic tree of four non-*Saccharomyces* yeast isolates based on the sequence analysis of the 5.8S rRNA ITS region using the maximum-likelihood method. The scale bar shows 0.05, Bootstrap support values were estimated based on 1000 replicates.
